# Supplementary material for: A structure for promoting entrepreneurship education: Understanding the interactions within the entrepreneurial ecosystem
Source: Research Square preprint supplement (doi:10.21203/rs.3.rs-8395537/v1), 2026-01-14
Supplement: Supplementary file 1 [file 54bb060b4090fc1650ecb935.xlsx]

## Sheet: Sheet1
Rows	Conditions
	SCN	INF	EOE	RDT	GOP	EF	GEP	Number of Cases	EE
1	1	1	1	1	1	1	1	8	1
2	1	1	0	1	1	1	1	2	1
3	1	1	1	1	1	1	0	2	1
4	1	1	1	1	0	1	1	1	1
5	0	1	0	1	1	1	1	1	1
