# Supplementary material for: A structure for promoting entrepreneurship education: Understanding the interactions within the entrepreneurial ecosystem
Source: Research Square preprint supplement (doi:10.21203/rs.3.rs-8395537/v1), 2026-01-14
Supplement: Supplementary file 2 [file b931e44c6e9845d775a8db33.xlsx]

## Sheet: Sheet1
Country	SocCulNor	Inf	EoE	ResDevTra	Gov	Fin	GovEntrePro	EE
Belarus	3.9	6.15	4.8	2.3	3.05	2.7	2.2	2.8
Brazil	4.4	4.6	4.7	2.6	2.55	3.45	3.3	2.9
Canada	5.7	6.3	4.85	4.2	5.25	5	4.7	4.35
Chile	5.3	6.15	4.15	3.3	5.05	3.8	5.4	3.55
Colombia	5.8	5.85	4.55	3.5	4.5	3.45	5.1	4.75
Croatia	3	5.4	4.65	3.3	3.05	4	4.1	3.05
Cyprus	3.6	5.35	4.3	3.8	4.8	3.95	3.9	3.35
Dominican Republic	5.3	5.85	3.55	1.9	3.65	2.6	3.7	3.25
Egypt	4.8	6	5.2	3.2	4.4	4.35	4	3
Finland	5.4	7.75	5.15	6	5.9	6.85	5.6	6.05
France	4.3	6.4	4.05	4.7	5.85	5.45	5.9	4.3
Germany	4.6	6.2	5.15	4.9	4.55	5.2	6.4	4
Greece	4.6	5.3	4.35	4.9	4.75	4	4.3	3.2
Guatemala	5.3	5.95	3.4	2.5	3.25	2.9	3.1	3.9
Hungary	4.3	6.5	3.85	4	4.55	4.8	4.4	3.25
India	5.3	5.75	5.5	4.4	5	4.85	4.8	4.15
Iran	3.7	4.8	3.95	2.4	2.6	3.8	2.5	1.9
Ireland	5.4	5.3	4.65	4.4	4.75	4.75	5.5	3.65
Israel	7.9	6.5	4.1	4.7	3.65	5.15	4.1	3.85
Italy	5.1	5.8	4.7	4.9	4.4	4.55	4.7	3.9
Jamaica	5.8	5.1	4.15	2.8	4.25	3.6	3.6	4.1
Japan	3.6	5.8	5.8	4.4	4.6	4.65	4.8	3.5
Kazakhstan	5.6	5.8	4.75	2.9	5.55	4.3	5	3.8
Latvia	5.2	6.6	5.2	4.5	4.55	4.6	5.2	4.3
Lithuania	6.2	7.65	5.95	5.8	6.05	5.85	6.1	5.15
Luxembourg	4.6	6.05	3.85	5.1	5.45	4.3	5.9	4.25
Mexico	5.4	5.95	4.45	3.2	3.55	4.2	3.9	3.9
Morocco	4	5.7	3.7	2.3	4.65	3.65	3.9	2.95
Netherlands	6.7	7.35	5.75	5.6	6.3	6.35	6.4	5.95
Norway	6.1	7.45	4.2	5.7	5.6	5	6.4	5.45
Oman	5.4	4.55	4.6	3.1	4.25	3.9	3.8	3.35
Panama	4.5	5.5	4.25	3	3.6	3.2	4	2.85
Poland	4	5.95	5.15	3.3	3.85	4.4	4.3	2.3
Qatar	6.1	6.45	5.3	5.2	5.3	4.65	5.6	5.75
Republic of Korea	5.7	6.35	6.3	4.5	6.15	5.45	5.9	4.55
Romania	3.7	5.65	4.6	2.7	3.6	4.05	3.1	3.2
Russian Federation	3.6	6	4.95	2.8	3.8	3.75	3.7	3.45
Saudi Arabia	6.8	6.9	6.35	5.4	6.15	6.25	6.5	4.45
Slovak Republic	4	6.4	4.5	3.5	3.4	4.5	3.9	3.65
Slovenia	3.2	5.7	5.15	3.5	4.05	4.1	5.1	3.2
South Africa	4	4.85	4.05	3.4	3.45	3.55	3.1	3.15
Spain	5.2	6.75	5	5.6	5.25	4.85	6.3	4.8
Sudan	3.4	3.75	4.85	2.2	2.2	3.85	1.8	2.25
Sweden	5.8	7.05	5	4.9	4.1	6.05	5	4.25
Switzerland	5.3	7	4.5	6.1	5.7	5.5	6.2	4.25
Turkey	3.7	4.7	5.4	3.9	3.9	4.15	4.3	2.9
United Arab Emirates	7.7	7.45	6.75	6.2	7.25	6.2	6.5	6.05
United Kingdom	5.3	6.15	5.2	4.2	4.9	4.8	4.3	4.1
United States	7	6.95	5.15	4.7	4.75	5.65	4.2	4.1
Uruguay	4	6.35	3.3	4.1	4.05	3.6	5.6	3.7
